# Supplementary material
Source: PubMed Central journal article supplement (PMC2998535)

Figure s1

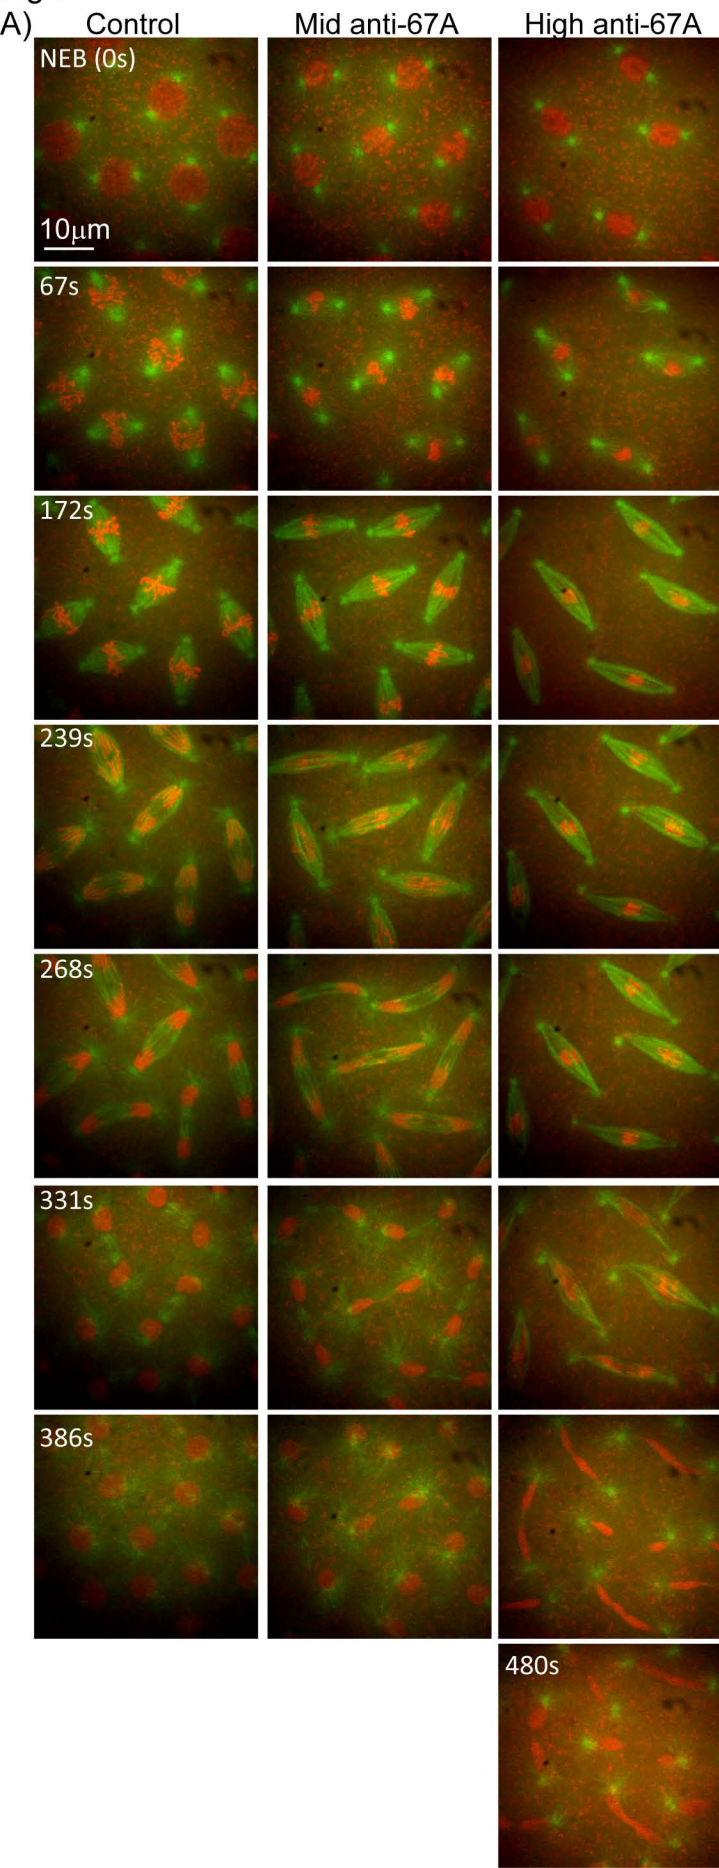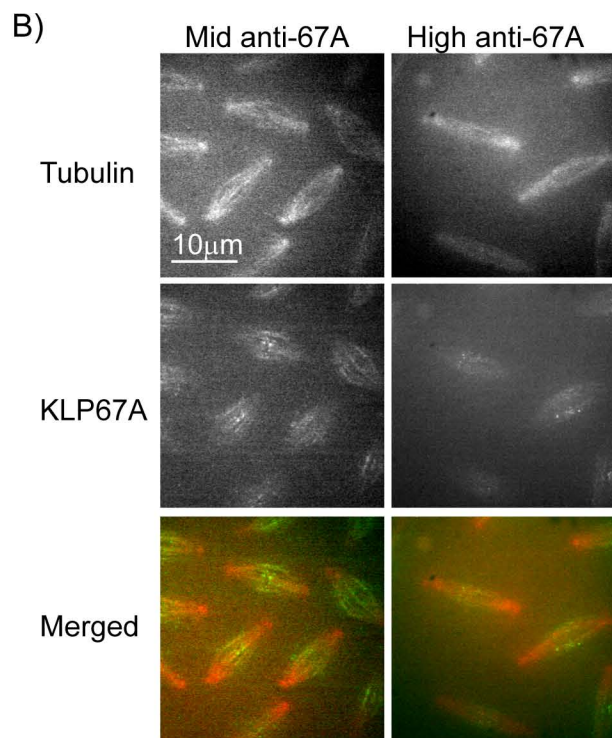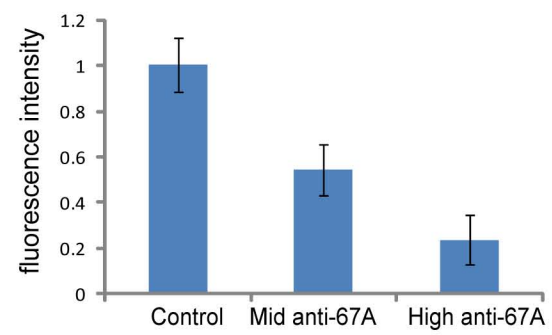

Supplement: NIHMS238972-supplement-supp_fig_01.pdf [file NIHMS238972-supplement-supp_fig_01.pdf]

Figure s2

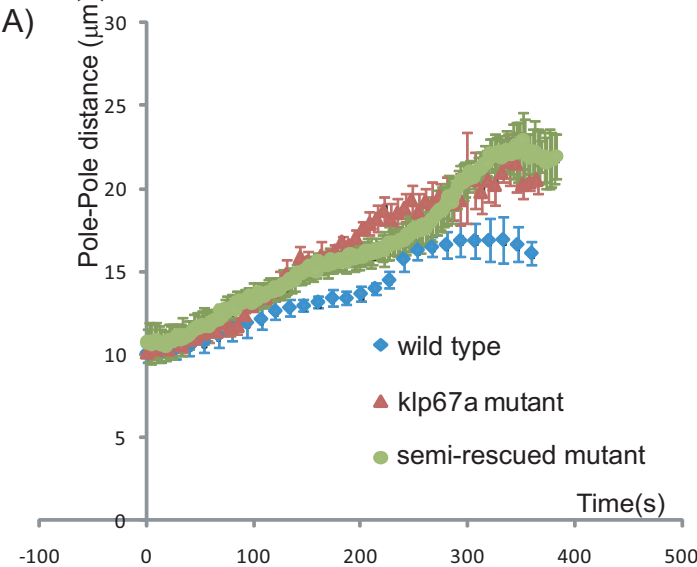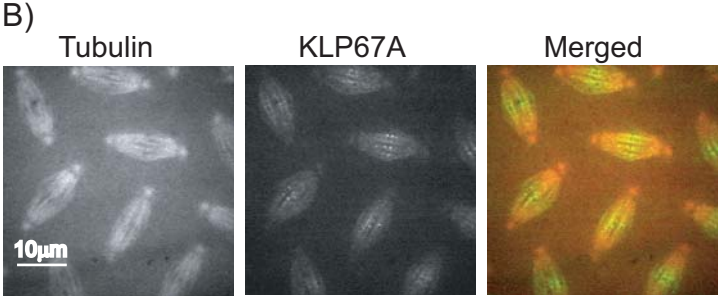

Supplement: NIHMS238972-supplement-supp_fig_02.pdf [file NIHMS238972-supplement-supp_fig_02.pdf]
